# Supplementary material for: Integrative analysis of genomic, epigenomic and transcriptomic data identified molecular subtypes of esophageal carcinoma
Source: publisher site journal article supplement (doi:10.18632/aging.202556), 2021-02-26
Supplement: Supplementary file [file aging-v13i5-202556-supplementary-material-SD1.pdf]

# SUPPLEMENTARY FIGURES

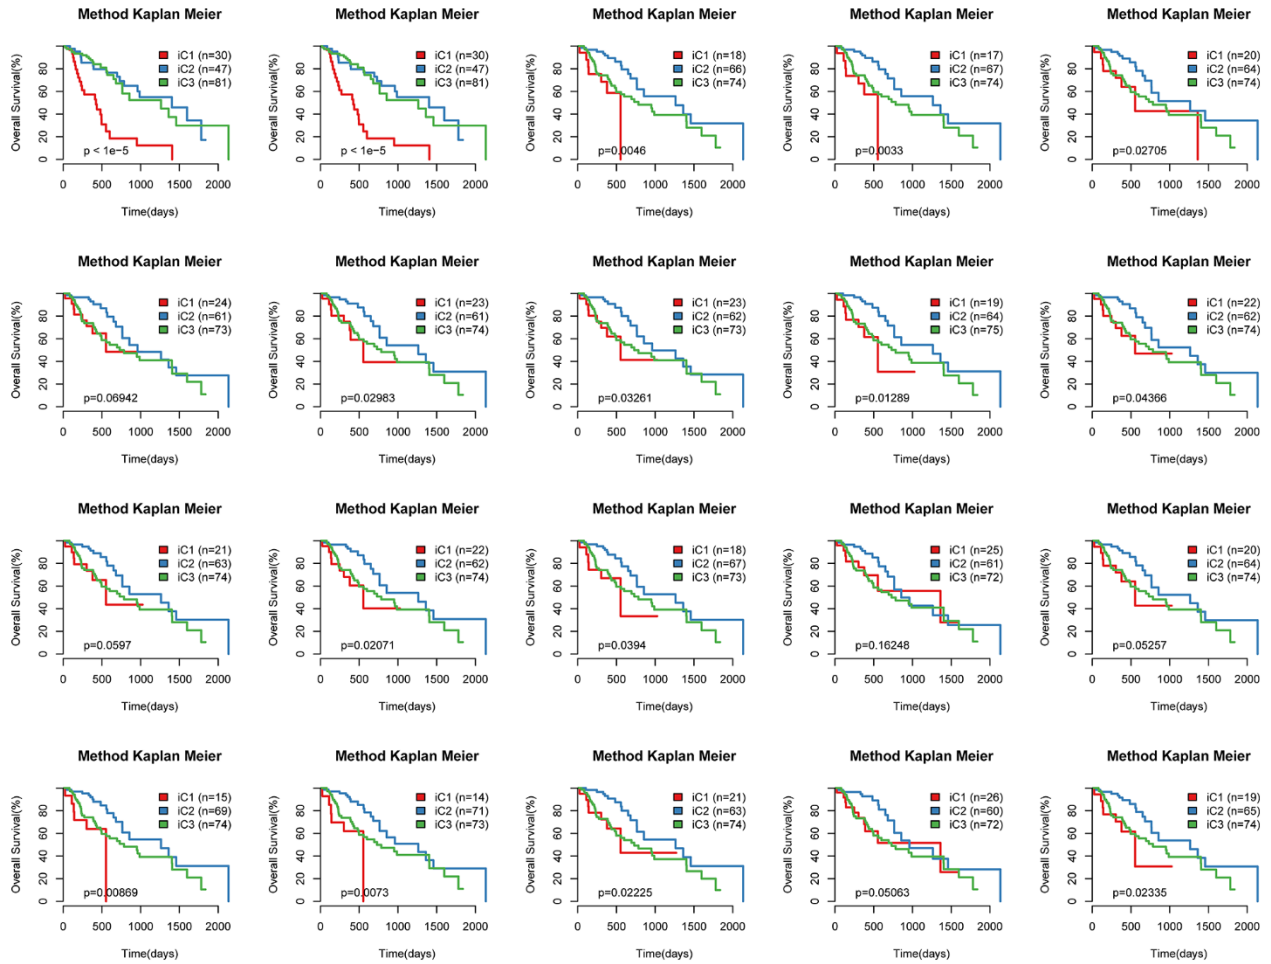

Supplementary Figure 1. Prognostic differences for each of the 20 clustering results identified by iCluster at k=2.

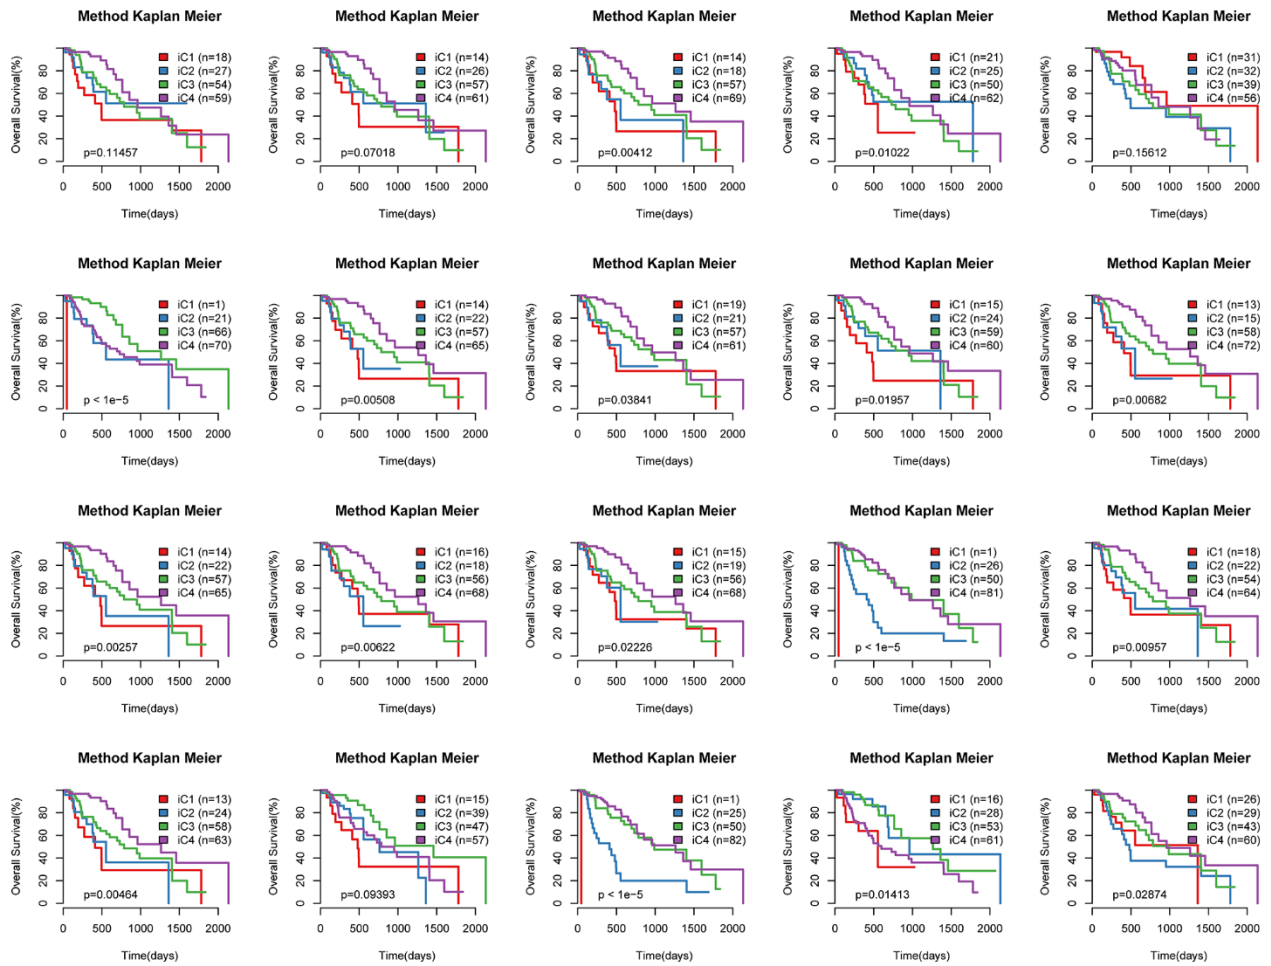

Supplementary Figure 2. Prognostic differences for each of the 20 clustering results identified by iCluster at k=3.

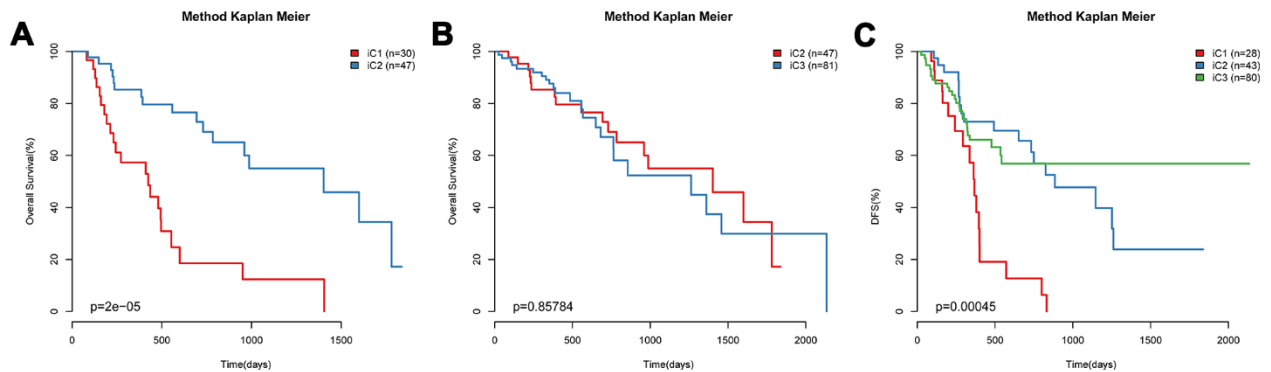

Supplementary Figure 3. Prognostic diversities of the three iCluster subtypes. (A) Overall survival diversity between iC1 and iC2. (B) Overall survival diversity between iC2 and iC3. (C) Progression-free survival proportions for the iC1, iC2 and iC3 subtypes.

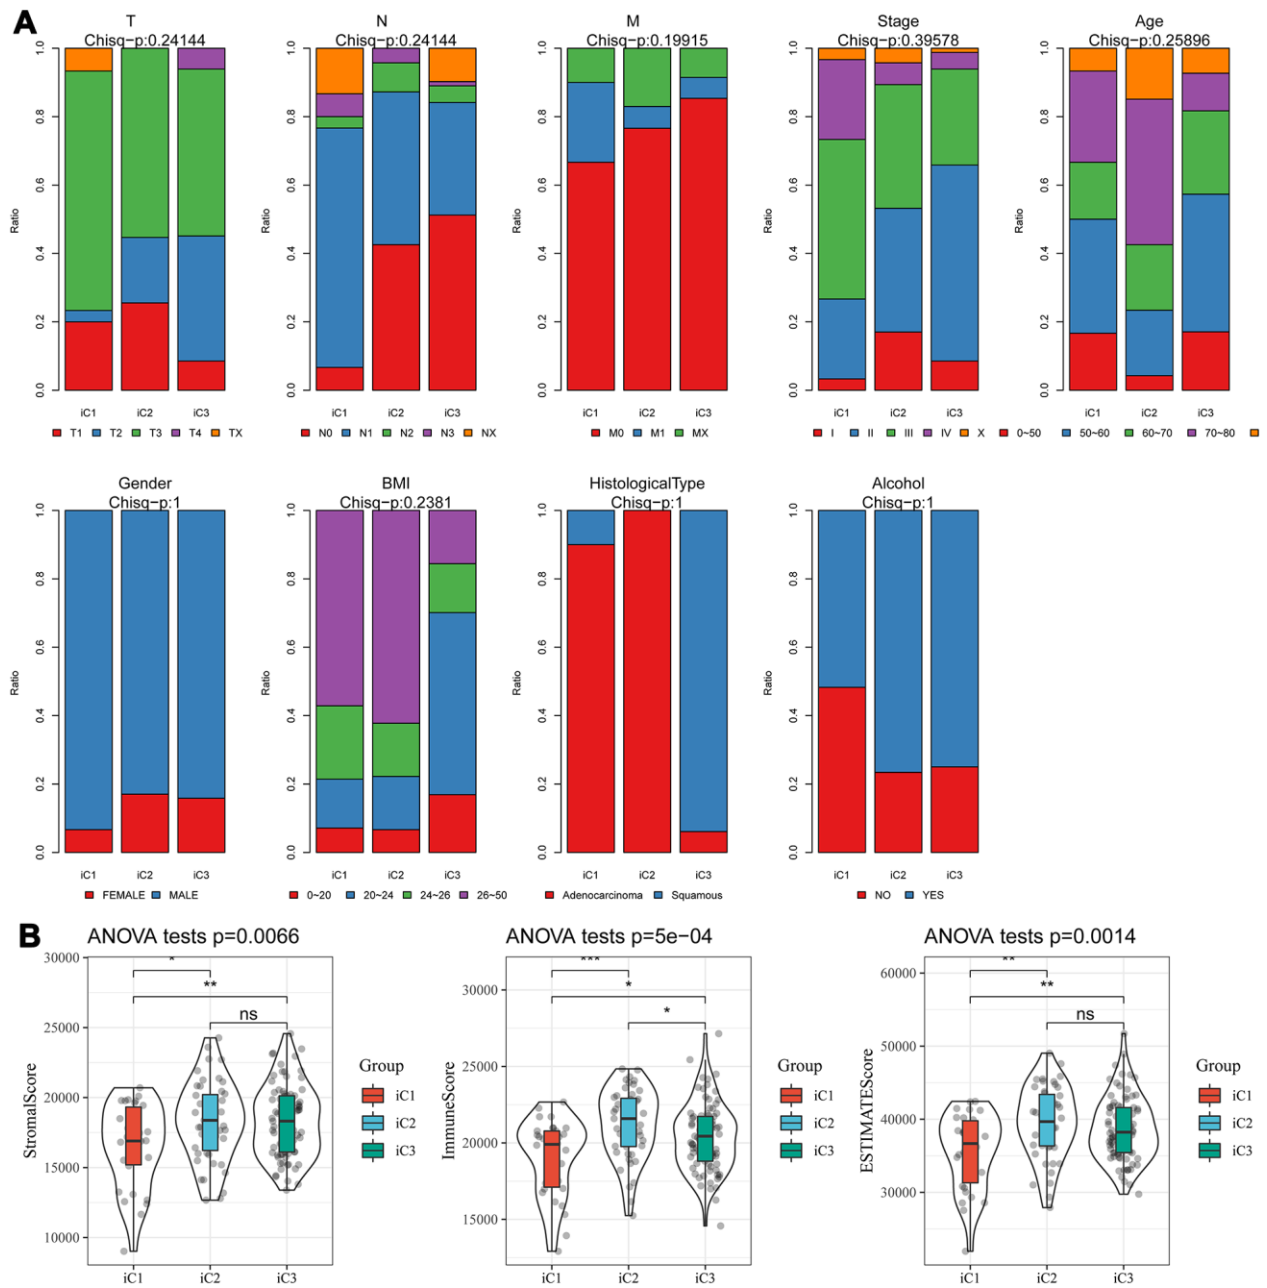

**Supplementary Figure 4. Differences in tumor immune microenvironmental and clinical features for three subtypes.** (A) Distribution of TNM, Stage, Gender, Age, BMI, Histological Type, Alcohol intake in the three subtypes. (B) Diversity of tumor immune microenvironment (TIME) score for the three subtypes.
